# Supplementary material
Source: HighWire-hosted journal article supplement (https://jnm.snmjournals.org/highwire/filestream/95152/field_highwire_adjunct_files/0/189183_Supplemental_Data.pdf)
Supplement: 189183_Supplemental_Data.pdf [file 189183_Supplemental_Data.pdf]

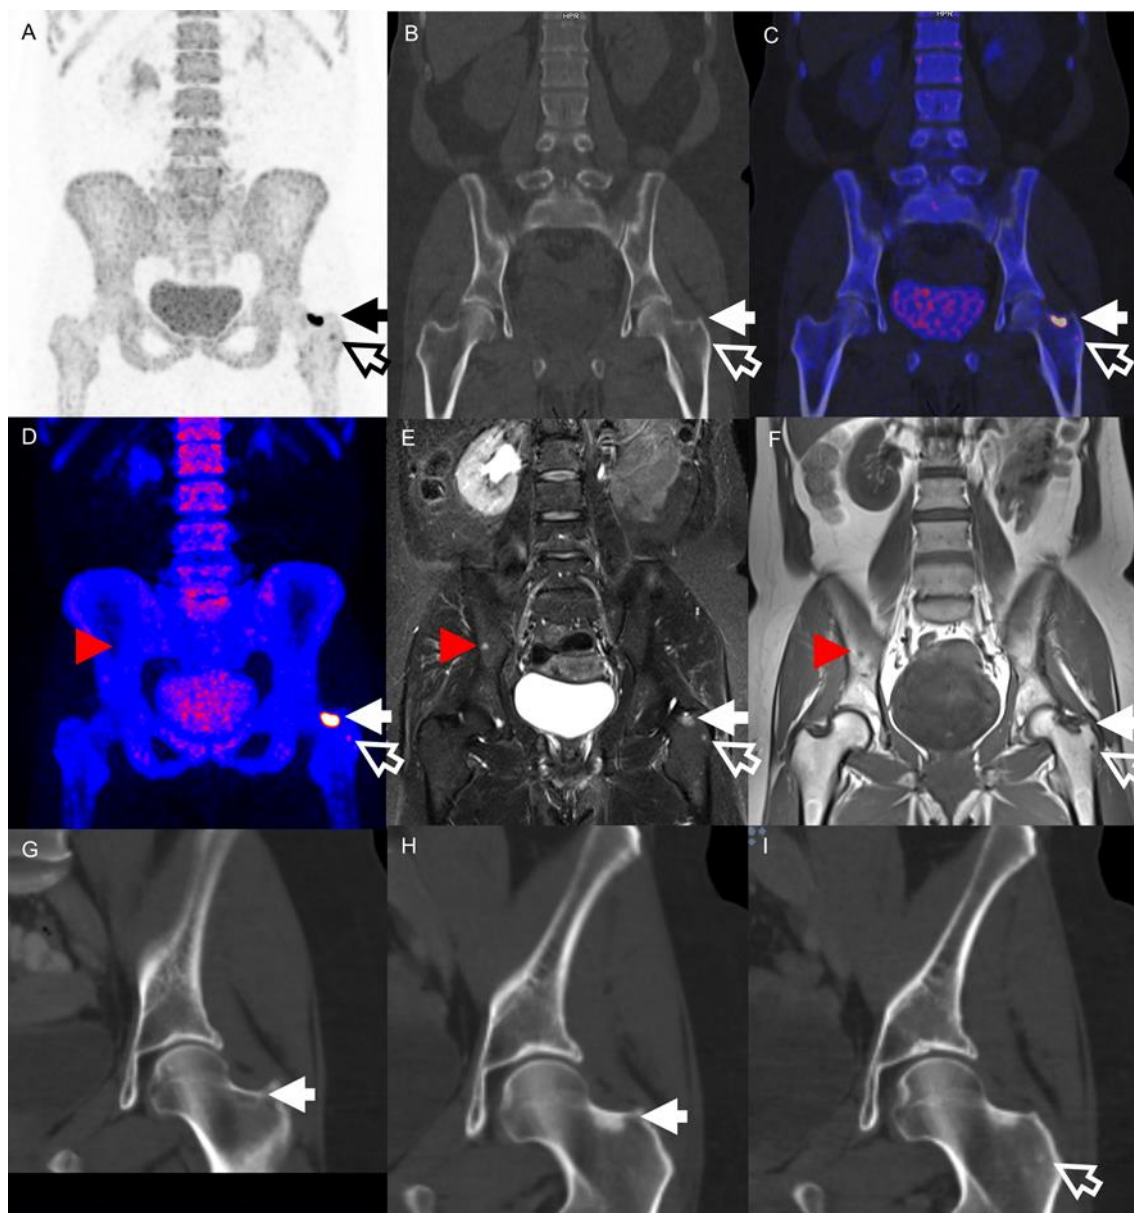

**SUPPLEMENTAL FIGURE 1.** Same patient as in Figure 3. A-C) PET/CT, D-F) PET/MRI. Two lesions in the left hip were identified on both PET and MR (solid and hallow arrow). G) The bigger lesion could retrospectively be found on a diagnostic CT one month prior to PET. H) CT 2 months after treatment shows a sclerotic transformation of the lesion. I) The smaller lesion has also turned sclerotic. MRI showed an additional lesion in the pelvic bone (red arrowheads) not identified on PET.
